# Supplementary material for: Ecological Modeling from Time-Series Inference: Insight into Dynamics and Stability of Intestinal Microbiota
Source: PLoS Comput Biol. 2013 Dec 12;9(12):e1003388. doi: 10.1371/journal.pcbi.1003388 (PMC3861043; doi:10.1371/journal.pcbi.1003388)
Supplement: Dataset S1 — Microsoft Excel file reporting data (processed taxa densities as well as antibiotic profiles), optimal regularization parameters and inferred model parameters. (XLSX) [file pcbi.1003388.s001.xlsx]

## Sheet: Y
Population	2	2	2	2	2	2	2	2	2	2	2	1	1	1	1	3	3	3	3	3	3	3	3	3	3	2	2	2	2	2	2	2	2	2	2	2	1	1	1	1	3	3	3	3	3	3	3	3	3
Replicate	1	1	1	1	1	1	1	1	1	1	1	1	1	1	1	1	1	1	1	1	1	1	1	1	1	2	2	2	2	2	2	2	2	2	2	2	2	2	2	2	2	2	2	2	2	2	2	2	2
ID	1	1	1	1	1	1	1	1	1	1	1	2	2	2	2	3	3	3	3	3	3	3	3	3	3	4	4	4	4	4	4	4	4	4	4	4	5	5	5	5	6	6	6	6	6	6	6	6	6
time (in d)	0	2	3	4	5	6	7	9	12	16	23	0	2	6	13	0	2	3	4	5	6	7	12	16	23	0	2	3	4	5	6	7	9	12	16	23	0	2	6	13	0	2	3	4	5	6	7	9	12
Data matrix Y with processed and estimated density values (in 1011 DNA copies per cm3):
undefined_genus_of_Enterobacteriaceae	2.3506e-05	0.86914	0.41501	5.0998	0.42916	0.24018	0.14225	0.46902	0.58179	0.0032515	0.015072	0	0	0	0	1.9583e-05	4.6613	4.8786	0.059979	0.14475	0.26443	0.56522	2.6249	4.3223	3.0436	4.5946e-05	0.67226	0.49195	0.204	0.50942	0.018577	0.29589	0.44604	0.44034	0.070052	0.0035308	0.001155	0.0011137	0.00086908	0.0016393	0.23325	0.93395	2.3976	0.4716	0.27616	4.9932	1.385	1.6103	3.9838
Blautia	0.00086677	4.0115e-05	0.0072401	0.0047352	2.3947	2.6006	0.11887	0.10996	0.1645	0.004687	0.016507	0.0065623	0.011831	0.011938	0.007335	5.875e-05	0.00079905	0.0013559	0.00031671	0.0053817	0.018012	0.04421	0.31986	3.5921	2.0311	0.0004514	5.804e-05	0.0013808	1.0803	1.1454	1.2151	0.13789	0.10544	0.3256	0.21501	0.0058109	0.0097317	0.0080431	0.01046	0.042623	0.48316	0.015005	0.00044015	0.011229	0.0090037	0.21532	0.10972	0.35874	2.4779
Barnesiella	0.092745	0.00016789	0.00012887	0.0023599	0.00085549	0.00068794	0.00010693	0.00012018	0.00018803	7.0144e-06	1.6258e-05	1.7504	1.9062	1.8324	1.5969	0.0097622	0.0010183	0.001208	2.1704e-05	4.1333e-05	0.00017071	0.00018846	0.00091923	0.0026339	0.0027007	0.067426	0.00022153	0.0001833	0.00065826	0.0015076	0.00063935	0.00020535	0.00023497	0.00044429	0.00018814	2.2784e-05	2.7665	2.0483	1.7458	2.0918	1.7757	0.00025872	0.00041343	9.6445e-05	4.6255e-05	0.0010204	0.00028451	0.00031706	0.0014679
undefined_genus_of_unclassified_Mollicutes	0.0014446	0.00033688	0.00051716	0.0045446	0.0016475	0.0013248	0.022957	0.11623	0.22487	0.019142	0.044009	0.011483	0.0078875	0.25517	0.0010479	0.00017625	0.0010965	0.0013007	4.8724e-05	0.00018558	0.0034491	0.00020292	0.55097	1.1767	4.4138	0.00039497	8.3436e-05	0.00019725	0.00024791	0.00056781	0.0002408	0.010386	0.071306	0.014822	0.068227	0.025156	0.0083412	0.024129	0.079495	0.027869	0.091197	0.0012936	0.00068977	0.005088	0.0059741	0.0018562	0.00047469	0.000529	0.002449
undefined_genus_of_Lachnospiraceae	0.21958	0.00011467	8.8017e-05	0.0016118	0.00058431	0.00046986	7.3033e-05	8.2079e-05	0.00012842	4.7911e-06	1.1105e-05	2.6576	1.2462	1.8921	0.85085	0.0073633	0.001143	0.00074197	0.00012181	0.00018558	0.00010486	0.00011576	0.0010318	0.0016178	0.0016588	0.086895	4.6837e-05	3.8757e-05	0.00013926	0.000319	0.00013533	4.3414e-05	4.9705e-05	9.3992e-05	3.9803e-05	4.8204e-06	3.0209	3.9478	2.09	1.7705	0.0096459	7.3919e-05	0.00021501	5.0128e-05	0.00092559	0.00053042	0.00014789	0.00016493	0.0053403
Akkermansia	0.033082	0.00019716	0.051716	0.0094701	0.50642	0.31196	0.28451	0.00014113	0.00022081	8.2377e-06	1.9094e-05	0	0	0	0	2.9374e-05	0.00015848	0.00018786	4.8724e-05	4.6394e-05	0.00095807	0.00021153	0.00014287	0.0004099	0.00042039	0.00056424	5.9862e-05	4.9539e-05	0.00017785	1.6581	0.84491	0.36704	6.3486e-05	0.00012005	5.0835e-05	6.1561e-06	0	0	0	0	0.00066397	0.00019589	0.00056945	0.00017545	0.00016829	0.0014055	0.00039188	0.00043672	0.01068
Clostridium_difficile	0	0	0	0	0	0	0	0	0	0	0	0	0	0	0	0	0.00017064	0.0040678	0.023875	0.023706	0.081055	0.031941	0.070163	1.8389	1.7067	0	0	0	0	0	0	0	0	0	0	0	0	0	0	0	0	0.000195	0.059412	0.14281	0.04485	0.15406	0.0051755	0.09055	1.3591
unclassified_Lachnospiraceae	0.032505	7.5413e-05	5.7873e-05	0.0010598	0.00038419	0.00030906	4.8014e-05	5.3943e-05	8.4429e-05	3.1502e-06	7.3034e-06	0.65623	0.41541	0.71474	0.66854	0.0035543	0.00029453	0.0054235	2.4362e-05	1.1942e-05	4.9341e-05	5.4467e-05	0.00026563	0.00076139	0.00078056	0.020934	0.00014686	0.00012152	0.00043639	0.00099949	0.00042385	0.00013613	0.00015577	0.00029454	0.00012472	1.5105e-05	0.5964	0.58849	0.38075	0.53361	0.0003336	9.843e-05	0.00028611	6.6751e-05	0.00033658	0.00070619	0.0001969	0.00021943	0.0010159
Coprobacillus	0.00014446	0.00025308	0.0018101	1.0891	0.0017166	0.001037	0.00016119	0.00018116	0.00028344	1.0574e-05	2.4509e-05	0.0082023	0.027606	0.019399	0.0041915	1.9583e-05	0.00096095	0.075931	0.003776	0.0020878	0.0019161	0.00017784	0.00086743	0.0024855	0.0025486	0.0002257	0.00011283	9.3359e-05	0.0021251	0.00076787	0.00032564	0.00010459	0.00011967	0.00022629	9.582e-05	1.1604e-05	0.0097317	0.0093834	0.0041841	0.0016393	0.00049792	0.0001469	0.1301	0.0029826	0.00016829	0.001054	0.00029388	0.0003275	0.0015161
Enterococcus	3.6832e-05	0.0023581	0.0010343	0.15152	0.017166	0.0013804	0.003862	0.00048228	9.6253e-05	1.4075e-05	3.2623e-05	0	0	0	0	2.4913e-06	0.00029079	0.0081357	0.0015592	0.0029692	0.013796	0.00084614	0.0072227	0.011825	0.036377	1.9846e-05	0.0023839	0.0011835	0.0092087	0.0016224	0.0020641	0.00088395	0.0015171	0.00047812	7.1195e-05	4.9036e-05	0	0	0	0	6.6443e-05	0.0010349	0.0067684	0.014738	0.0033658	0.0018562	3.9296e-05	0.010382	0.032042
Other	0.11138	0.0040425	0.0025858	0.42617	0.090981	0.012423	0.0025747	0.010369	0.0060367	0.0011964	0.0031645	0.97446	1.383	1.725	1.0248	0.011583	0.012573	0.0094916	0.0018271	0.0019022	0.0059399	0.0006346	0.015477	0.076868	0.13036	0.033064	0.00023839	0.0021698	0.078628	0.029203	0.0013761	0.013258	0.0032871	0.0066935	0.0038467	0.00014711	1.931	1.7909	1.3912	1.3836	0.075414	0.0059504	0.0060163	0.0007018	0.0069842	0.10766	2.7897e-05	0.0046141	0.22963
Vector of 1 referring to growth vector	1	1	1	1	1	1	1	1	1	1	1	1	1	1	1	1	1	1	1	1	1	1	1	1	1	1	1	1	1	1	1	1	1	1	1	1	1	1	1	1	1	1	1	1	1	1	1	1	1
Clindamycin signal	1	0	0	0	0	0	0	0	0	0	0	0	0	0	0	1	0	0	0	0	0	0	0	0	0	1	0	0	0	0	0	0	0	0	0	0	0	0	0	0	1	0	0	0	0	0	0	0	0
[truncated: 28 more columns]

## Sheet: F
ID	1	1	1	1	1	1	1	1	1	1	1	2	2	2	2	3	3	3	3	3	3	3	3	3	3	4	4	4	4	4	4	4	4	4	4	4	5	5	5	5	6	6	6	6	6	6	6	6	6
time (in d)	-2	0	1	2	3	4	5	7	10	14	21	1	3	7	14	-2	0	1	2	3	4	5	10	14	21	-2	0	1	2	3	4	5	7	10	14	21	1	3	7	14	-2	0	1	2	3	4	5	7	10
Data matrix F:
undefined_genus_of_Enterobacteriaceae	5.259	-0.73919	2.5086	-2.4751	-0.58042	-0.5238	0.59652	0.07182	-1.2967	0.2191	-0.34909	0	0	0	0	6.1901	0.045565	-4.3986	0.88101	0.60258	0.75964	0.30712	0.12469	-0.050106	0.0064841	4.7955	-0.31226	-0.88024	0.91514	-3.3114	2.7681	0.20521	-0.0042821	-0.45958	-0.42682	0.025376	-0.0182	-0.062014	0.09066	-0.071768	0.69365	0.94278	-1.6261	-0.53514	2.8948	-1.2824	0.075375	0.30194	-0.19123
Blautia	-1.5365	5.1956	-0.42461	6.226	0.082481	-3.0855	-0.038938	0.13426	-0.88953	0.17986	-0.13032	0.29471	0.0022359	-0.069577	0.11683	1.3051	0.52881	-1.4543	2.8328	1.208	0.89793	0.39578	0.60465	-0.081454	0.0025561	-1.0256	3.1693	6.6623	0.058567	0.059028	-2.1761	-0.13416	0.37584	-0.10374	-0.51585	-0.068736	-0.095284	0.065686	0.20069	0.012633	-1.736	-3.529	3.2391	-0.22086	3.1745	-0.67418	0.59233	0.64419	-0.025856
Barnesiella	-3.1572	-0.26451	2.9076	-1.0147	-0.21798	-1.8615	0.058401	0.14921	-0.82216	0.12009	-0.16004	0.042622	-0.0098673	-0.019648	0.17882	-1.1302	0.17081	-4.0192	0.64415	1.4183	0.098892	0.31694	0.26317	0.0035786	-0.12072	-2.8591	-0.18944	1.2785	0.82871	-0.85785	-1.1358	0.067371	0.21234	-0.21483	-0.30159	-0.25679	-0.15029	-0.03995	0.025831	-0.040335	-4.417	0.46876	-1.4555	-0.7348	3.0938	-1.2772	0.054169	0.51082	-0.17852
undefined_genus_of_unclassified_Mollicutes	-0.72794	0.42863	2.1733	-1.0147	-0.21801	2.8524	0.81097	0.21998	-0.61591	0.11893	-0.13692	-0.18781	0.86916	-0.78502	0.14055	0.91401	0.17077	-3.2845	1.3373	2.9224	-2.833	1.5813	0.18969	0.18886	-1.1672	-0.77737	0.8604	0.22859	0.82871	-0.85781	3.7643	0.96325	-0.52363	0.38169	-0.14253	-0.1436	0.53111	0.29807	-0.14974	0.36142	-2.1278	-0.62881	1.9983	0.16057	-1.1689	-1.3636	0.054168	0.51081	-0.17851
undefined_genus_of_Lachnospiraceae	-3.7787	-0.26452	2.9076	-1.0147	-0.218	-1.8615	0.058389	0.14921	-0.82214	0.12009	-0.16005	-0.37866	0.10439	-0.11417	-0.043853	-0.93141	-0.43214	-1.8069	0.42107	-0.5709	0.098905	0.43751	0.11243	0.0035816	-0.12068	-3.7629	-0.18937	1.2791	0.82881	-0.85748	-1.1369	0.067663	0.21237	-0.21482	-0.30158	-0.25689	0.13379	-0.159	-0.023696	0.13952	-2.4357	1.0677	-1.4561	2.9158	-0.55676	-1.2772	0.054545	1.1592	-0.66471
Akkermansia	-2.5614	5.5695	-1.6976	3.9792	-0.48448	-0.092136	-3.8044	0.14921	-0.82215	0.12009	-0.16004	0	0	0	0	0.84276	0.17005	-1.3495	-0.048992	3.0277	-1.5105	-0.078494	0.2635	0.0036116	-0.12046	-1.1217	-0.18928	1.2782	9.1402	-0.67421	-0.83375	-4.3312	0.21236	-0.21483	-0.30159	-0.25682	0	0	0	0	-0.61033	1.0671	-1.1773	-0.041647	2.1225	-1.2772	0.054172	1.0656	-0.59461
Clostridium_difficile	0	0	0	0	0	0	0	0	0	0	0	0	0	0	0	0	3.1713	1.7697	-0.007078	1.2294	-0.93122	0.15738	0.81653	-0.010661	0.067473	0	0	0	0	0	0	0	0	0	0	0	0	0	0	0	0	5.7192	0.87705	-1.1582	1.2341	-3.3934	1.431	0.90289	0.16096
unclassified_Lachnospiraceae	-3.0331	-0.26472	2.9076	-1.0147	-0.21762	-1.862	0.058219	0.14933	-0.82211	0.12013	-0.1601	-0.22862	0.13566	-0.0095463	0.071443	-1.2453	2.9131	-5.4055	-0.71296	1.4187	0.098845	0.3169	0.26326	0.0035523	-0.12084	-2.4798	-0.18943	1.2785	0.82872	-0.85787	-1.1357	0.06736	0.21235	-0.21483	-0.30158	-0.25679	-0.0066741	-0.10885	0.048217	0.04112	-0.6103	1.067	-1.4554	1.6179	0.74105	-1.2772	0.054169	0.51082	-0.17848
Coprobacillus	0.28035	1.9674	6.3997	-6.4527	-0.50401	-1.8615	0.058405	0.14921	-0.82215	0.12009	-0.16004	0.60682	-0.088211	-0.21888	0.26975	1.9466	4.3697	-3.0011	-0.59258	-0.085783	-2.3772	0.31693	0.26317	0.0035815	0.66657	-0.34668	-0.1894	3.1251	-1.018	-0.85782	-1.1358	0.067368	0.21234	-0.21483	-0.30158	-0.2568	-0.018223	-0.20191	-0.13386	0.053731	-0.61035	6.7863	-3.7755	-2.8749	1.8347	-1.2772	0.054152	0.51081	-0.1785
Enterococcus	2.0796	-0.82412	4.987	-2.1778	-2.5206	1.0288	-1.0402	-0.53718	-0.48064	0.12009	-0.0030897	0	0	0	0	2.3799	3.3314	-1.6521	0.64413	1.5361	-2.7915	0.42886	0.12325	0.16053	-0.24579	2.3942	-0.70024	2.0517	-1.7362	0.24078	-0.84804	0.27008	-0.38491	-0.47611	-0.053266	-0.1259	0	0	0	0	1.3728	1.878	0.77815	-1.4768	-0.59513	-3.8552	2.7883	0.37567	0.12248
Other	-1.6581	-0.44685	5.1048	-1.5442	-1.9911	-1.5739	0.69655	-0.18033	-0.40463	0.13895	-0.18936	0.17505	0.055248	-0.074389	0.0045549	0.041011	-0.28118	-1.6477	0.040268	1.1387	-2.2365	0.63882	0.40068	0.075454	-0.026781	-2.4662	2.2085	3.5901	-0.99045	-3.0551	2.2654	-0.69732	0.23705	-0.13848	-0.46625	-0.28285	-0.037654	-0.06314	-0.00078117	0.057074	-1.2698	0.011024	-2.1486	2.2978	2.7353	-8.2582	2.5542	1.3025	-0.5838
[truncated: 28 more columns]

## Sheet: D_lambda
Diagonal matrix Dλ for optimal λ*=(2.25,9,0.25):
	2.25	0	0	0	0	0	0	0	0	0	0	0	0
	0	2.25	0	0	0	0	0	0	0	0	0	0	0
	0	0	2.25	0	0	0	0	0	0	0	0	0	0
	0	0	0	2.25	0	0	0	0	0	0	0	0	0
	0	0	0	0	2.25	0	0	0	0	0	0	0	0
	0	0	0	0	0	2.25	0	0	0	0	0	0	0
	0	0	0	0	0	0	2.25	0	0	0	0	0	0
	0	0	0	0	0	0	0	2.25	0	0	0	0	0
	0	0	0	0	0	0	0	0	2.25	0	0	0	0
	0	0	0	0	0	0	0	0	0	2.25	0	0	0
	0	0	0	0	0	0	0	0	0	0	2.25	0	0
	0	0	0	0	0	0	0	0	0	0	0	9	0
	0	0	0	0	0	0	0	0	0	0	0	0	0.25

## Sheet: MmuE
Figure 2:
Genera (sorted by susceptibility)	Interactions											Growth	Susceptibilities
Barnesiella	-0.20516	0.098398	0.16739	-0.16461	-0.14341	0.019881	-0.51535	-0.39162	0.34635	0.0088853	-0.26894	0.36807	-3.2926
undefined_genus_of_Lachnospiraceae	0.062123	-0.10489	-0.043011	-0.15466	-0.1872	0.027031	-0.45919	-0.41388	0.3013	0.022081	-0.19657	0.31023	-3.0354
unclassified_Lachnospiraceae	0.14373	-0.19203	-0.10162	-0.13971	-0.16537	0.013651	-0.50414	-0.7724	0.29257	-0.005959	-0.20645	0.3561	-2.0909
Other	0.22403	0.13813	0.00045883	-0.83125	-0.2238	0.22027	-0.20529	-1.0097	0.66639	-0.038986	-0.40032	0.54006	-1.9395
Blautia	-0.18016	-0.051261	-5.03e-05	-0.054212	-0.70858	0.016198	-0.50756	0.55363	0.15757	0.22438	0.10635	0.70898	-1.3491
undefined_genus_of_unclassified_Mollicutes	-0.11159	-0.03721	-0.042591	0.041044	0.26134	-0.42266	-0.18536	-0.43231	0.1647	-0.061038	-0.26461	0.47064	-1.1018
Akkermansia	-0.12669	-0.18576	-0.12222	0.3809	0.4003	-0.16078	-1.2124	1.3897	-0.37922	0.19189	-0.096352	0.2297	-0.92446
Coprobacillus	-0.071257	0.00060448	0.080355	-0.4548	-0.50349	0.16899	-0.56222	-4.3508	0.44315	-0.22341	-0.2074	0.83005	-0.79401
Clostridium_difficile	-0.037541	-0.033333	-0.049912	-0.090424	-0.10211	0.03229	-0.18179	-0.30301	-0.055765	0.01436	-0.0076697	0.39181	-0.31272
Enterococcus	-0.04225	-0.013105	0.02398	-0.11784	-0.32893	0.020748	0.054767	-2.0963	0.11124	-0.19213	0.023816	0.29075	1.0671
undefined_genus_of_Enterobacteriaceae	-0.3742	0.27843	0.24887	-0.16829	0.08399	0.033691	-0.23242	-0.39513	0.31454	-0.038764	-0.3841	0.32367	3.7009
	Barnesiella	undefined_genus_of_Lachnospiraceae	unclassified_Lachnospiraceae	Other	Blautia	undefined_genus_of_unclassified_Mollicutes	Akkermansia	Coprobacillus	Clostridium_difficile	Enterococcus	undefined_genus_of_Enterobacteriaceae
